# Supplementary material for: Motional freedom of dimethylammonium ions in a cyanoelpasolite, [(CH3)2NH2]2KCo(CN)6, which exhibits phase transition associated with a distinct change in dielectric property
Source: Royal Society of Chemistry journal article supplement (doi:10.1039/d0cp00680g), 2020-01-01
Supplement: d0cp00680g1.pdf [file d0cp00680g1.pdf]

## Electronic Supplementary Information (ESI)

# Motional freedom of dimethylammonium ions in a cyanoelpasolite $[(\text{CH}_3)_2\text{NH}_2]_2\text{KCo}(\text{CN})_6$ which exhibit phase transition associated with a distinct change of dielectric property

Tetsuo Asaji\*

*Department of Chemistry, College of Humanities and Sciences,  
Nihon University, 3-25-40 Sakurajosui, Setagaya-ku, Tokyo 156-8550, Japan*

E-mail: asaji@chs.nihon-u.ac.jp

### Contents

- Fig. S1** Powder X-ray diffraction of  $[(\text{CH}_3)_2\text{NH}_2]_2\text{KCo}(\text{CN})_6$  by Cu  $K\alpha$  radiation.
- Fig. S2** Powder X-ray diffraction of  $[(\text{CD}_3)_2\text{NH}_2]_2\text{KCo}(\text{CN})_6$  by Cu  $K\alpha$  radiation.
- Fig. S3** Powder X-ray diffraction of  $[(\text{CH}_3)_2\text{NH}_2]_2\text{KCr}(\text{CN})_6$  by Cu  $K\alpha$  radiation.
- Fig. S4** Crystal structure of low-temperature phase of  $[(\text{CH}_3)_2\text{NH}_2]_2\text{KCo}(\text{CN})_6$ .
- Fig. S5**  $^1\text{H}$  NMR line of  $[(\text{CD}_3)_2\text{NH}_2]_2\text{KCo}(\text{CN})_6$  observed at 120 K (red line) and the simulated Pake doublet  $F(x)$  (blue line).
- Fig. S6a-i**  $^{14}\text{N}$  NQR spectra of  $(\text{DMA})_2\text{KCo}(\text{CN})_6$ . The disappearance of the NQR signals under a sufficiently strong magnetic field was checked at room and liquid nitrogen temperatures in order to eliminate the possibility of false signal. The results are shown in Fig. S6b-i.
- Fig. S7**  $^2\text{H}$  NMR spectra simulation.

### References

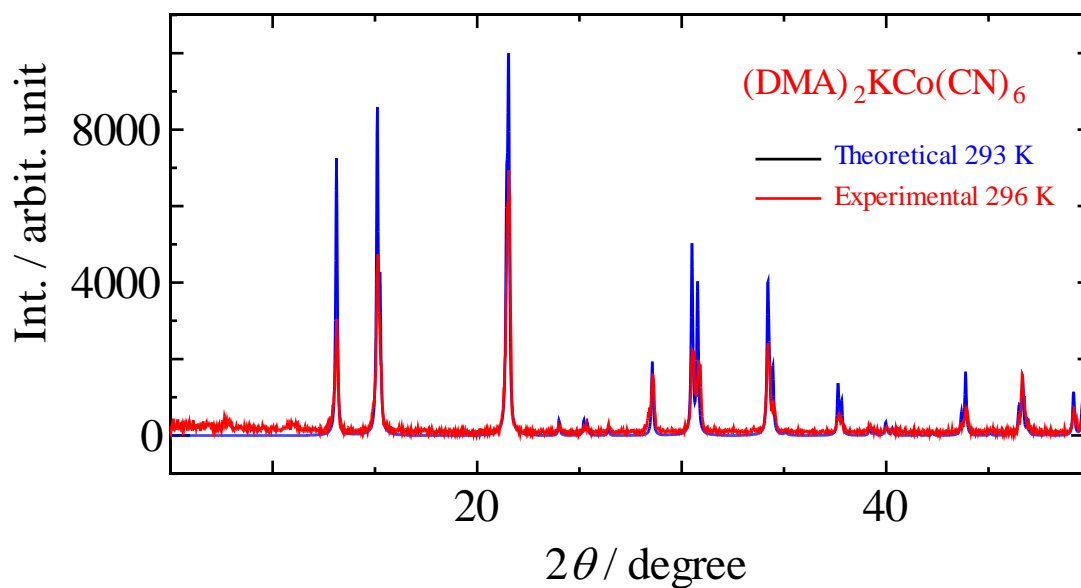

**Fig. S1** Powder X-ray diffraction of  $[(\text{CH}_3)_2\text{NH}_2]_2\text{KCo}(\text{CN})_6$  by Cu  $K\alpha$  radiation. The abbreviation “DMA” stands for dimethylammonium. Theoretical pattern was calculated for  $P4/mnc$ ,  $a = b = 8.2895(13)$ ,  $c = 11.621(3)$  Å,  $Z = 2$  at 293 K [1]. The small peaks were observed at around  $7.7^\circ$  and  $11.0^\circ$ , which are close to the forbidden reflections  $(0\ 0\ 1)$  and  $(1\ 0\ 0)$  at  $7.61^\circ$  and  $10.67^\circ$ , respectively, calculated by the crystal data. This may indicate that the strict symmetry of the present crystals is lower than  $P4/mnc$ .

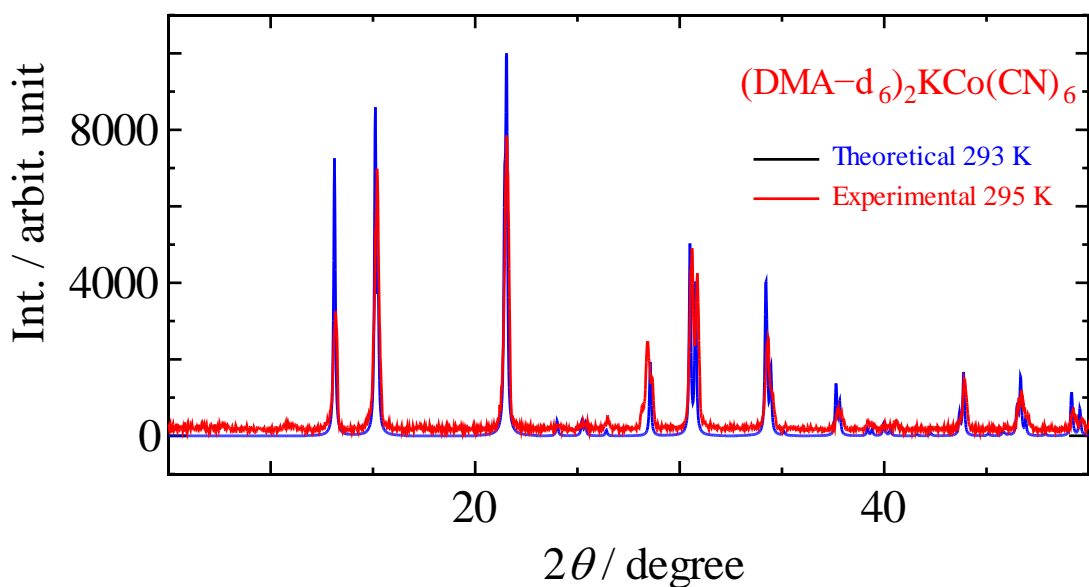

**Fig. S2** Powder X-ray diffraction of  $[(\text{CD}_3)_2\text{NH}_2]_2\text{KCo}(\text{CN})_6$  by Cu  $K\alpha$  radiation. The abbreviation “DMA” stands for dimethylammonium. Theoretical pattern was calculated for  $P4/mnc$ ,  $a = b = 8.2895(13)$ ,  $c = 11.621(3)$  Å,  $Z = 2$  at 293 K [1]. The small peaks were observed at around  $7.7^\circ$  and  $10.9^\circ$ , which are close to the forbidden reflections  $(0\ 0\ 1)$  and  $(1\ 0\ 0)$  at  $7.61^\circ$  and  $10.67^\circ$ , respectively, calculated by the crystal data. This may indicate that the strict symmetry of the present crystals is lower than  $P4/mnc$ . There observed at room temperature no appreciable change of the crystal parameters by deuteration of the methyl groups.

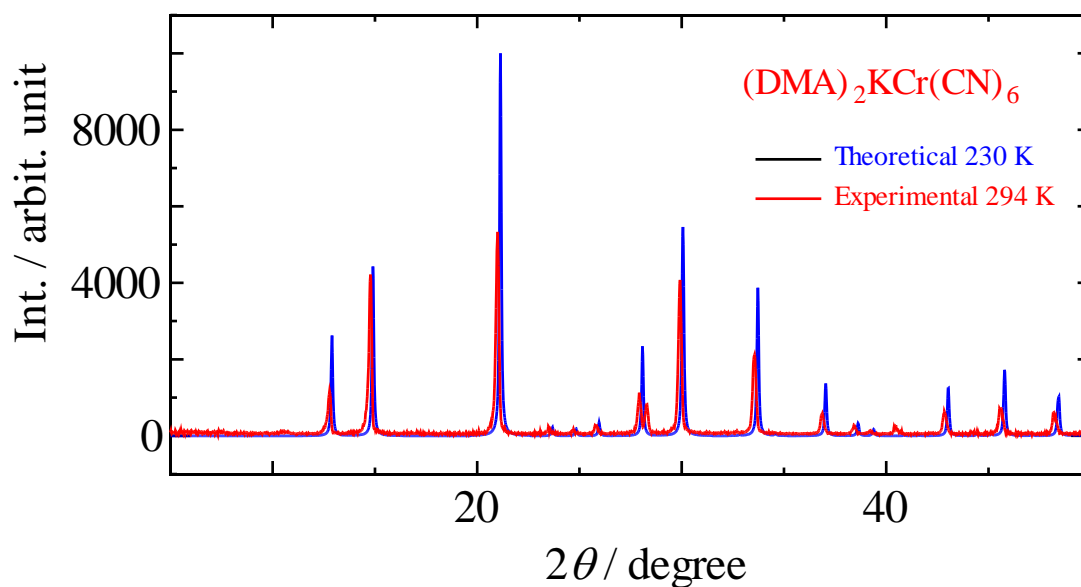

**Fig. S3** Powder X-ray diffraction of  $[(\text{CH}_3)_2\text{NH}_2]_2\text{KCr}(\text{CN})_6$  by Cu  $K\alpha$  radiation. The abbreviation “DMA” stands for dimethylammonium. Theoretical pattern was calculated for  $P4/mnc$ ,  $a = b = 8.40300(10)$ ,  $c = 11.8999(3)$  Å,  $Z = 2$  at 230 K [2]. In the experimental pattern, the (2 0 0) and (2 2 0) reflections from KCl crystals can be recognized at  $28.30^\circ$  and  $40.44^\circ$ . Due to this contamination, the (2 1 2) reflection at  $27.92^\circ$  of the title compound looks like to be split.

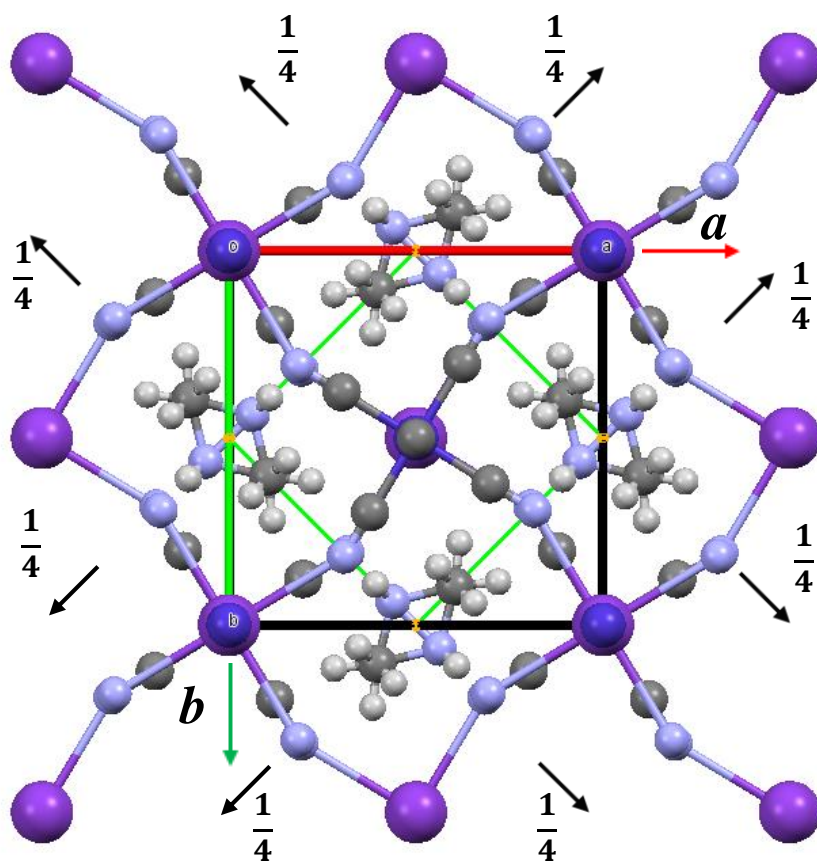

**Fig. S4** Crystal structure of low-temperature phase of  $[(\text{CH}_3)_2\text{NH}_2]_2\text{KCo}(\text{CN})_6$  according to Zhang *et al* [1]. Space group  $P4/mnc$ ,  $a = b = 8.242(6)$ ,  $c = 11.584(10)$  Å,  $Z = 2$  at 113 K. Three two-fold rotation axes  $C_2$  along  $[001]$ ,  $[110]$ , and  $[\bar{1}10]$  directions go through the  $(\text{CH}_3)_2\text{NH}_2^+$  ion site.

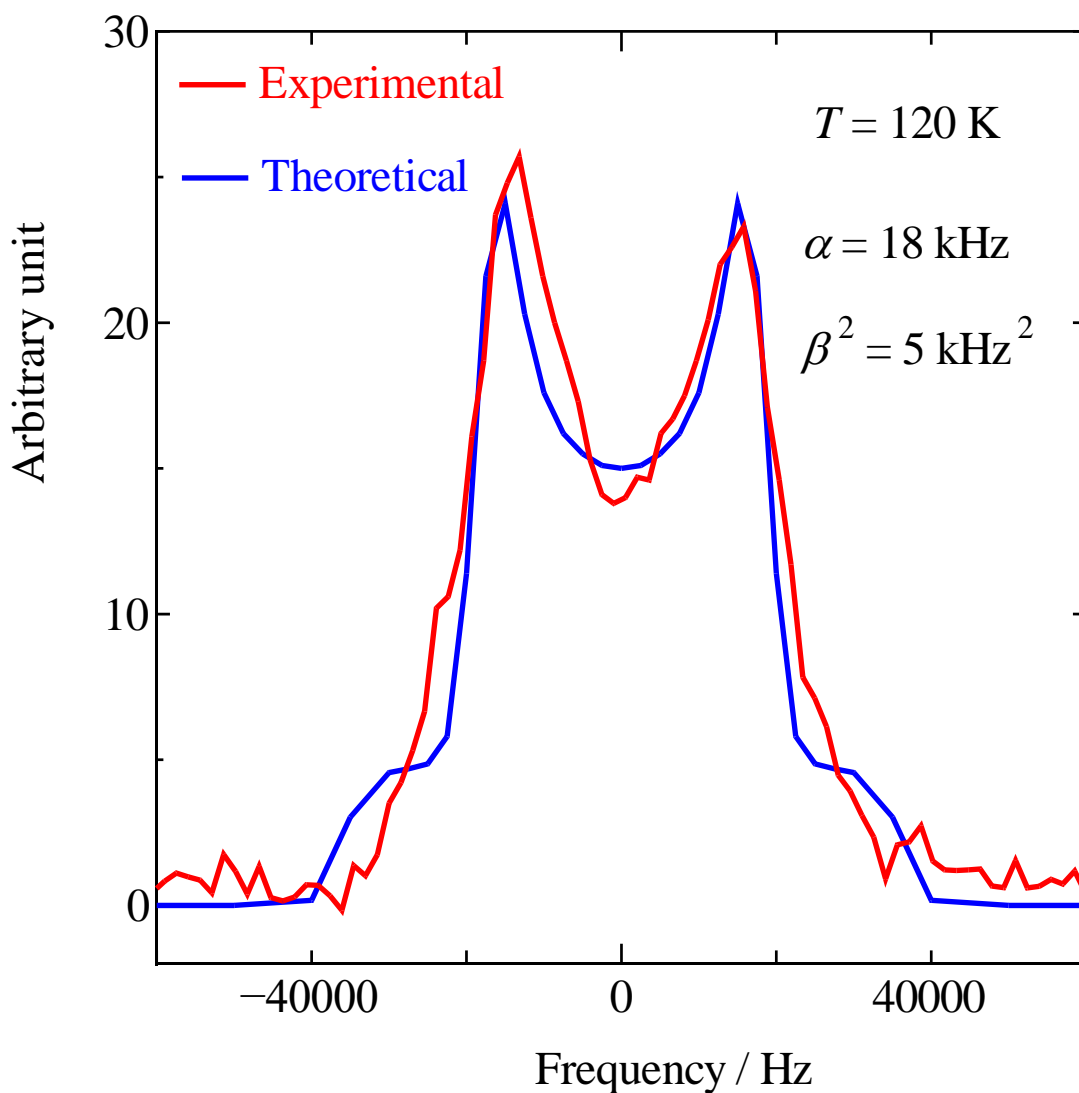

**Fig. S5**  $^1\text{H}$  NMR line of  $[(\text{CD}_3)_2\text{NH}_2]_2\text{KCo}(\text{CN})_6$  observed at 120 K (red line) and the simulated Pake doublet  $F(x)$  (blue line). The argument  $x$  is the frequency deflection (Hz) from the center of the resonance.  $F(x)$  is given by the following equations [3].

$$F(x) = N \int_{-\infty}^{+\infty} f(x') \exp\left(-\frac{(x-x')^2}{2\beta^2}\right) dx'$$

$$\begin{aligned}
f(x) &= \left(-\frac{x}{\alpha} + 1\right)^{\frac{1}{2}} & -2\alpha \leq x \leq -\alpha \\
&= \left(-\frac{x}{\alpha} + 1\right)^{\frac{1}{2}} + \left(\frac{x}{\alpha} + 1\right)^{\frac{1}{2}} & -\alpha < x < \alpha \\
&= \left(\frac{x}{\alpha} + 1\right)^{\frac{1}{2}} & \alpha \leq x \leq 2\alpha
\end{aligned}$$

where  $\alpha$  is given as

$$\alpha = \frac{3\gamma^2 \hbar}{8\pi r^3} \quad (7)$$

by the proton-magnetogyric ratio  $\gamma$  and the distance  $r$  between the two protons,  $\beta$  represents line-broadening due to the dipolar interaction outside the pair protons, and  $N$  is a normalization factor.

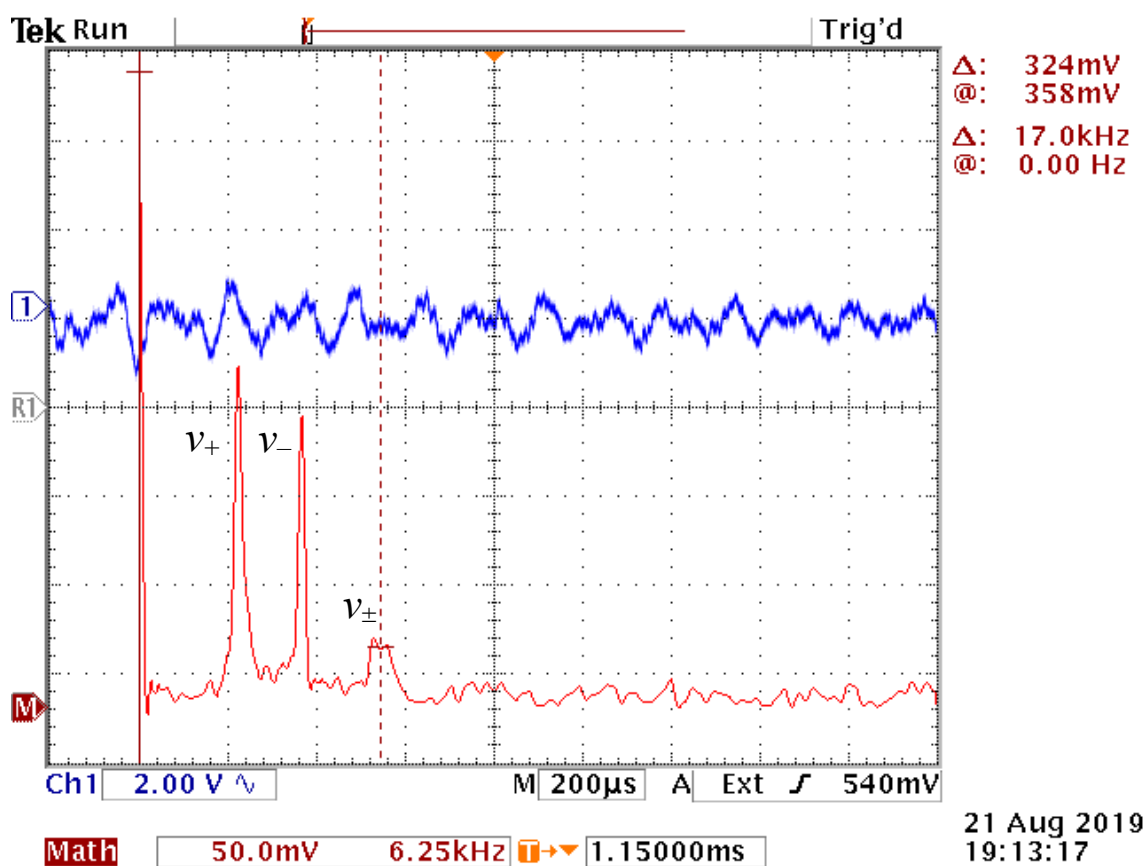

**Fig. S6a**  $^{14}\text{N}$  NQR spectra of  $(\text{DMA})_2\text{KCo}(\text{CN})_6$  at 298 K. Free induction decay (blue) and Fourier transform spectra (red) accumulated by 1024 times with the repetition time of 0.5 s. Since spectrometer frequency is 2618.0 kHz,  $\nu_+ = 2625.0$  kHz,  $\nu_- = 2606.5$  kHz, and  $\nu_{\pm} = 2635.0$  kHz.



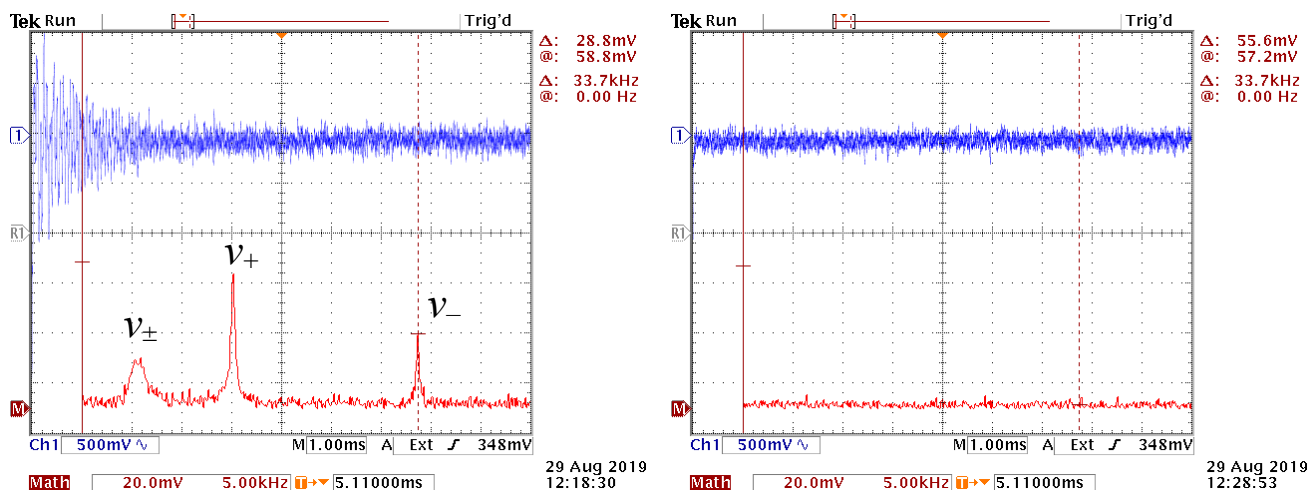

**Fig. S6b** Effect of magnetic field on  $^{14}\text{N}$  NQR spectra of  $(\text{DMA})_2\text{KCo}(\text{CN})_6$  at 297.5 K. Spectrometer frequency  $\text{RF} = 2640.0$  kHz, number of accumulation  $N = 2048$ , repetition time  $t = 0.2$  s. With (right) and without (left) magnetic field of *ca.* 110 G.

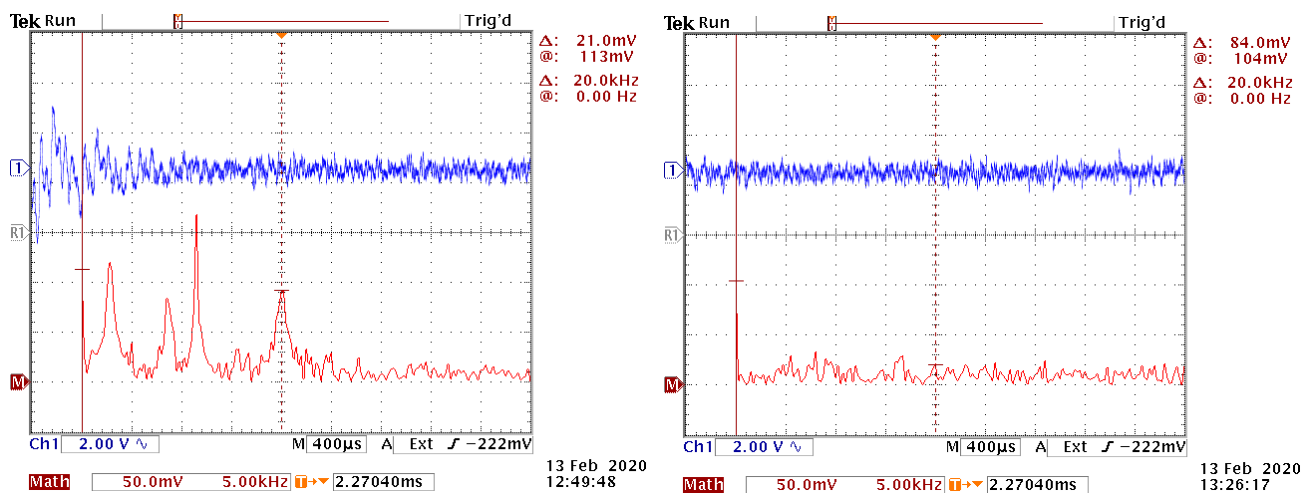

**Fig. S6c** Effect of magnetic field on  $^{14}\text{N}$  NQR spectra of  $(\text{DMA})_2\text{KCo}(\text{CN})_6$  at 77.3 K. Spectrometer frequency  $\text{RF} = 2680.0$  kHz, number of accumulation  $N = 256$ , repetition time  $t = 5$  s. With (right) and without (left) magnetic field of *ca.* 110 G.

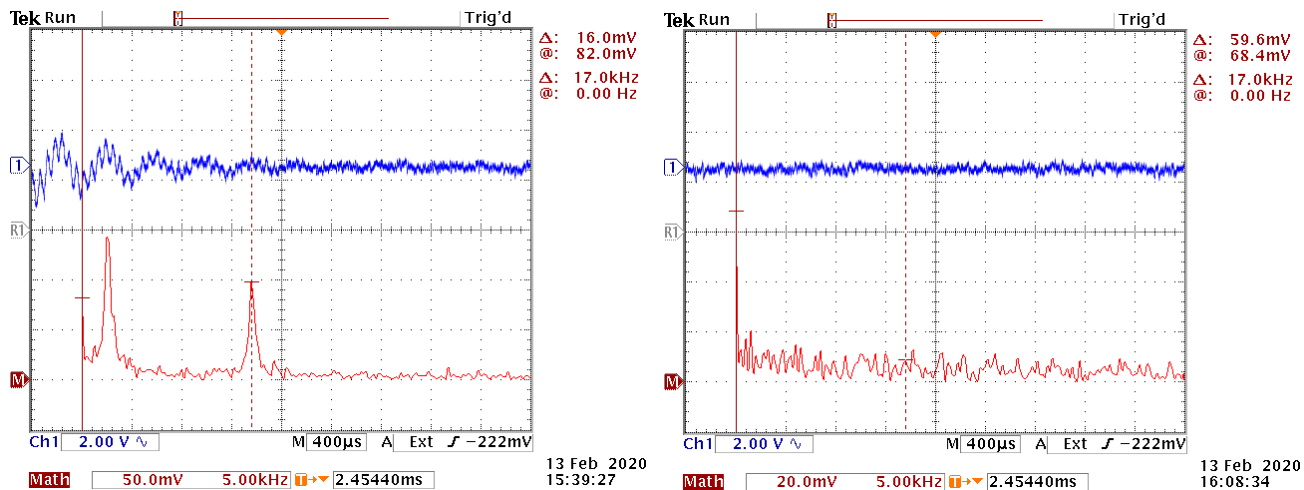

**Fig. S6d** Effect of magnetic field on  $^{14}\text{N}$  NQR spectra of  $(\text{DMA})_2\text{KCo}(\text{CN})_6$  at 77.3 K. Spectrometer frequency  $\text{RF} = 2740.0$  kHz, number of accumulation  $N = 1024$ , repetition time  $t = 1$  s. With (right) and without (left) magnetic field of *ca.* 110 G.

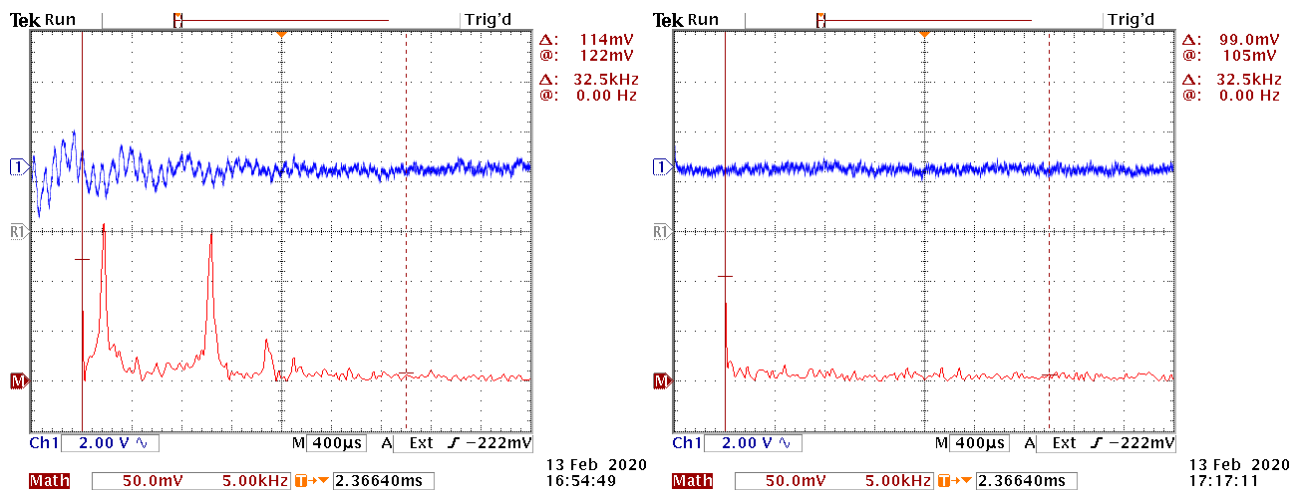

**Fig. S6e** Effect of magnetic field on  $^{14}\text{N}$  NQR spectra of  $(\text{DMA})_2\text{KCo}(\text{CN})_6$  at 77.3 K. Spectrometer frequency  $\text{RF} = 2710.0$  kHz, number of accumulation  $N = 1024$ , repetition time  $t = 1$  s. With (right) and without (left) magnetic field of *ca.* 110 G.

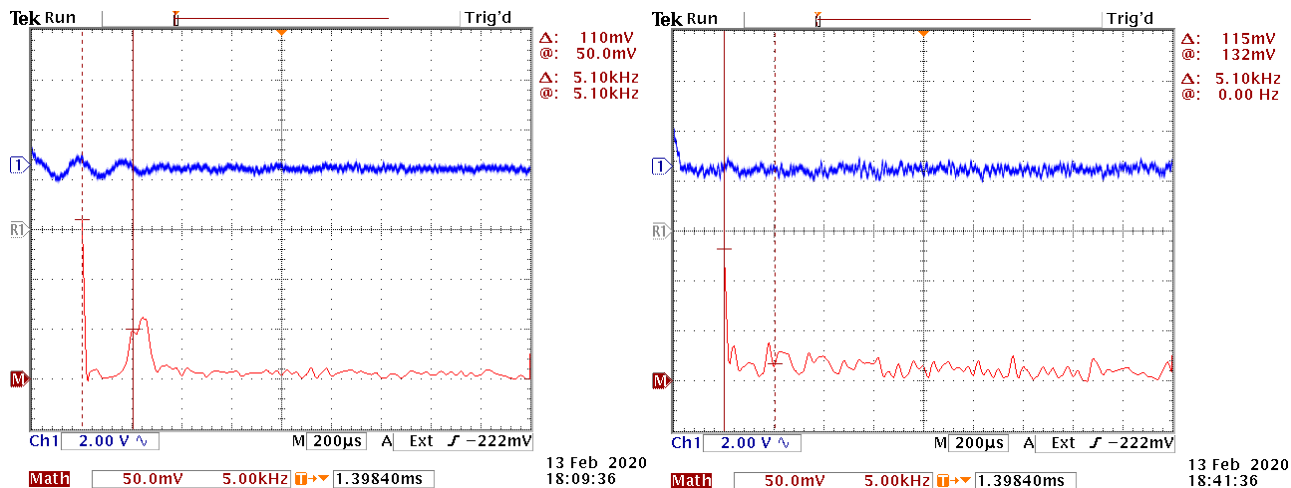

**Fig. S6f** Effect of magnetic field on  $^{14}\text{N}$  NQR spectra of  $(\text{DMA})_2\text{KCo}(\text{CN})_6$  at 77.3 K. Spectrometer frequency  $\text{RF} = 2774.0$  kHz, number of accumulation  $N = 512$ , repetition time  $t = 3$  s. With (right) and without (left) magnetic field of *ca.* 110 G.

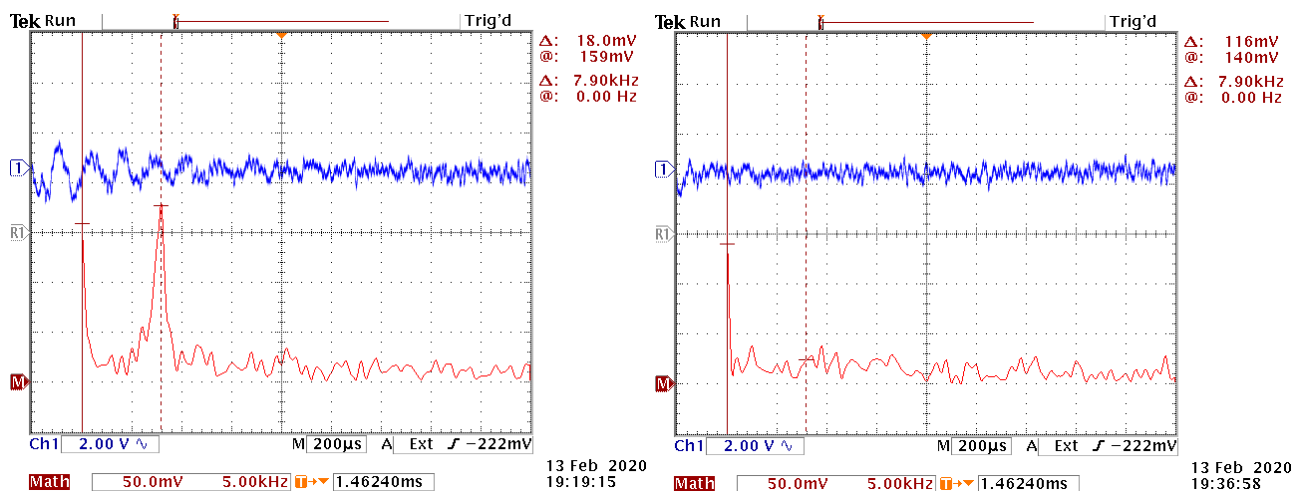

**Fig. S6g** Effect of magnetic field on  $^{14}\text{N}$  NQR spectra of  $(\text{DMA})_2\text{KCo}(\text{CN})_6$  at 77.3 K. Spectrometer frequency  $\text{RF} = 2600.0$  kHz, number of accumulation  $N = 256$ , repetition time  $t = 3$  s. With (right) and without (left) magnetic field of *ca.* 110 G.

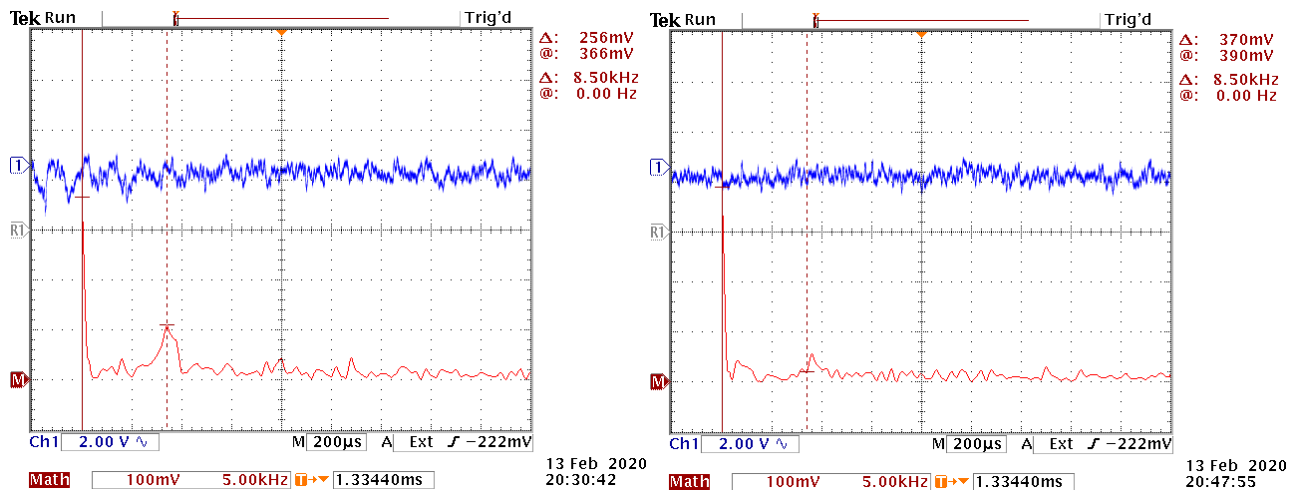

**Fig. S6h** Effect of magnetic field on  $^{14}\text{N}$  NQR spectra of  $(\text{DMA})_2\text{KCo}(\text{CN})_6$  at 77.3 K. Spectrometer frequency  $\text{RF} = 2640.0$  kHz, number of accumulation  $N = 256$ , repetition time  $t = 3$  s. With (right) and without (left) magnetic field of *ca.* 110 G.

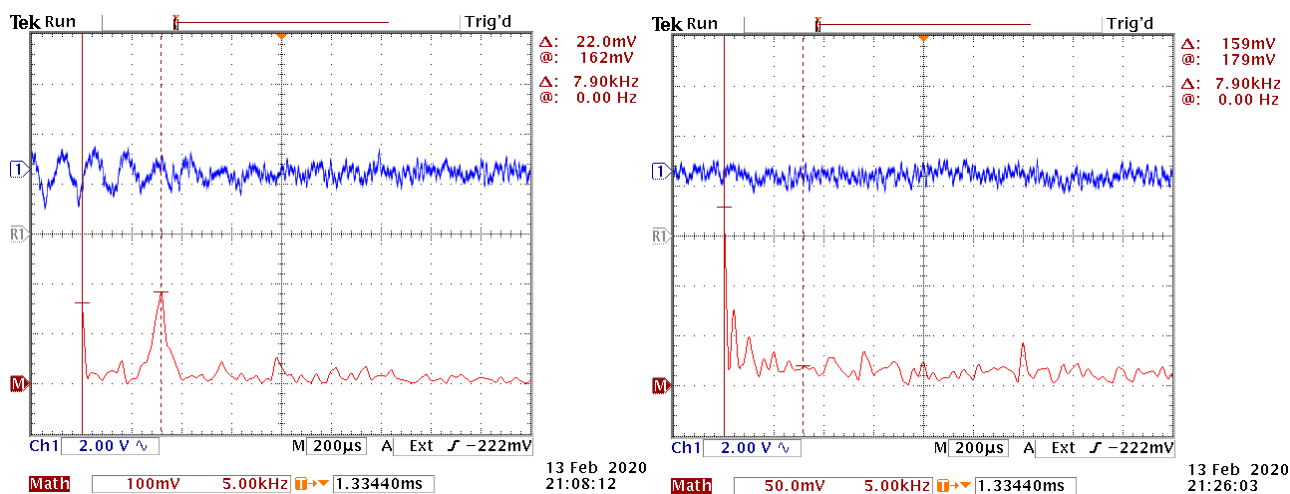

**Fig. S6i** Effect of magnetic field on  $^{14}\text{N}$  NQR spectra of  $(\text{DMA})_2\text{KCo}(\text{CN})_6$  at 77.3 K. Spectrometer frequency  $\text{RF} = 2580.0$  kHz, number of accumulation  $N = 256$ , repetition time  $t = 3$  s. With (right) and without (left) magnetic field of *ca.* 110 G.

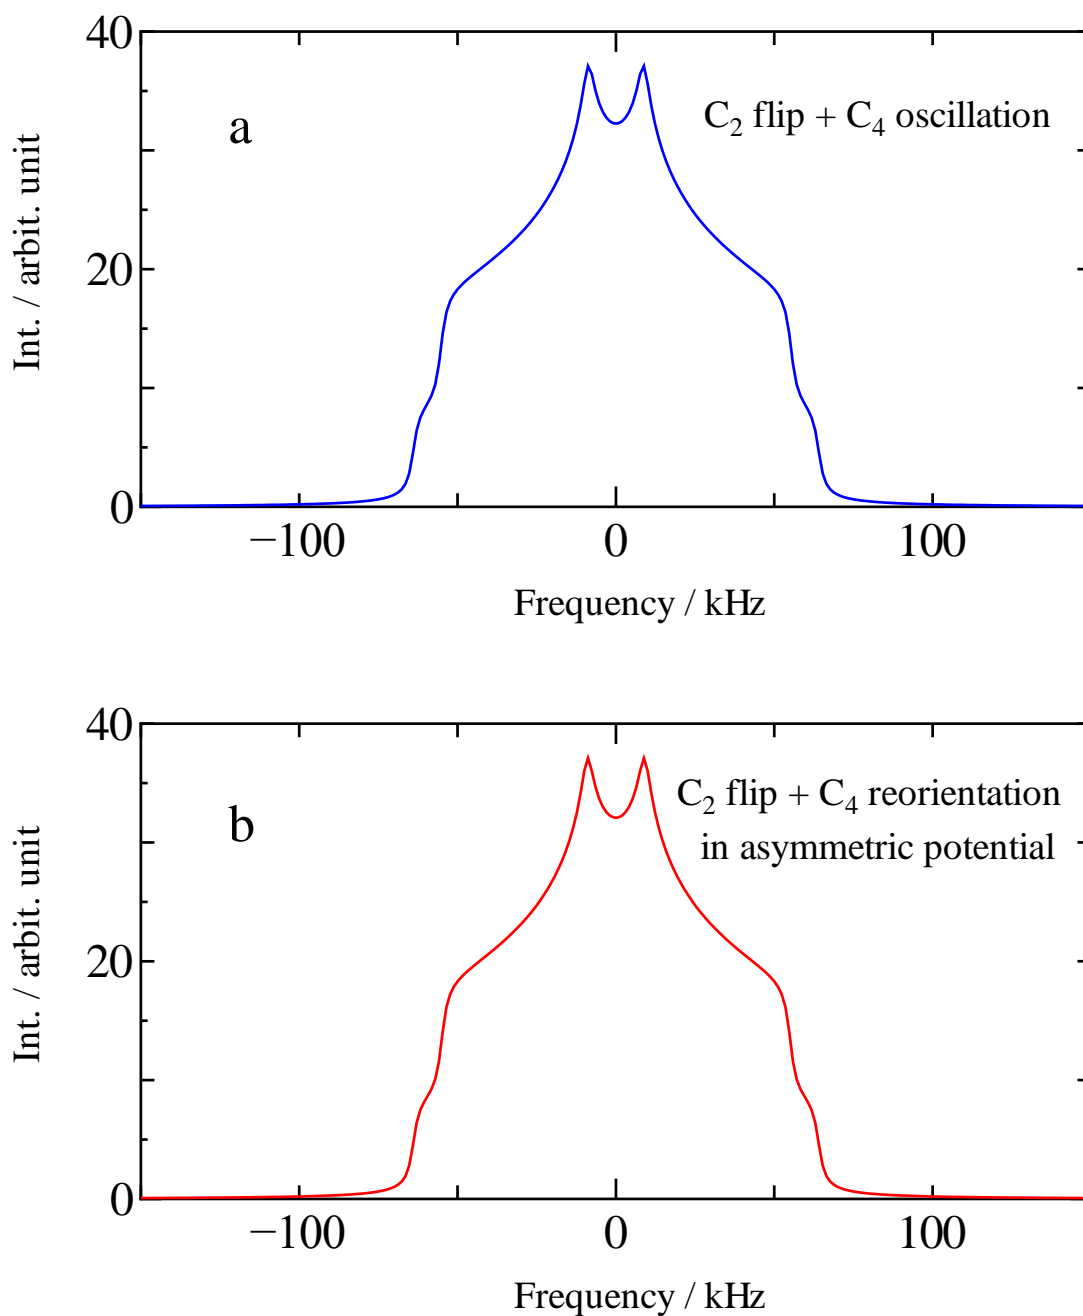

**Fig. S7**  $^2\text{H}$  NMR spectra simulation. The D-N-D bond angle was set at  $107^\circ$ . The quadrupole coupling constant of 128 kHz and the asymmetry parameter  $\eta = 0$  were used. The calculation was done by use of “NMR Weblab, A Tool for Simulation of Solid State NMR Spectra 6.6.2” [4]. As for the axis notation, see Fig. 7 in the text. (a)  $^2\text{H}$  NMR line-shape calculated assuming very fast C<sub>2</sub> flip about the C<sub>2, $\eta$</sub>  axis and fast rotational oscillation about the C<sub>2, $\zeta$</sub>  axis (pseudo C<sub>4</sub> axis) with Gaussian jump angle distribution full width of  $35^\circ$ . (b)  $^2\text{H}$  NMR line-shape calculated assuming very fast C<sub>2</sub> flip about the C<sub>2, $\eta$</sub>  axis and fast four sites reorientation among A, B, A', B' sites with population of 0.91 at A or A' and 0.09 at B or B' (pseudo C<sub>4</sub> reorientation about the C<sub>2, $\zeta$</sub>  axis).

## References

- [1] W. Zhang, H.-Y. Ye, R. Graf, H. W. Spiess, Y.-F. Yao, R.-Q. Zhu, and R.-G. Xiong, *J. Am. Chem. Soc.*, 2013, **135**, 5230-5233.
- [2] M. Rok, G. Bator, B. Zarychta, B. Dziuk, J. Repeć, W. Medycki, M. Zamponi, G. Usevičius, M. Šimėnas, and J. Banys, *Dalton Trans.*, 2019, **48**, 4190-4202.
- [3] T. Asaji and K. Ashitomi, *J. Phys. Chem. C*, 2013, **117**, 10185-10190; A. Abragam, *The Principles of Nuclear Magnetism*, Oxford University Press, London, 1961.
- [4] V. Macho, L. Brombacher, and H. W. Spiess, *Appl. Magn. Reson.* 2001, **20**, 405-432.
